# Supplementary material
Source: PubMed Central journal article supplement (PMC3365772)
Supplement: supp_M112.341859_jbc.M112.341859-1.pdf [file supp_M112.341859_jbc.M112.341859-1.pdf]

Supplemental Figure 1

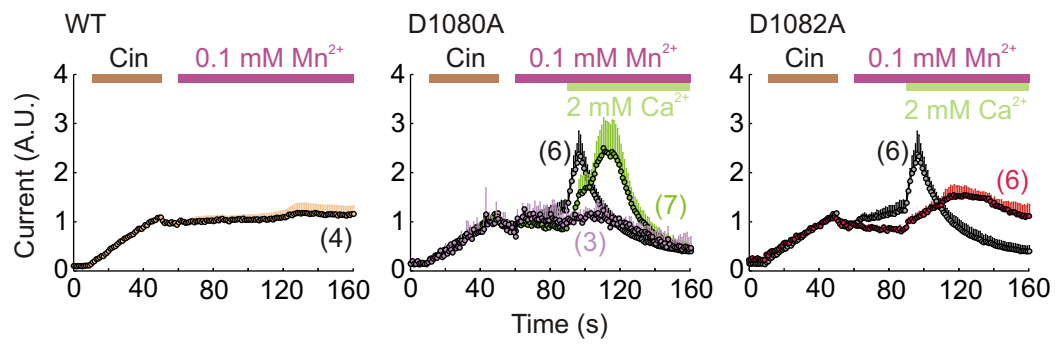

Fig. S1.

Manganese treatment did not alter the phenotypes of the most affected mutants D1080A and D1082A. *Left*, introduction of 0.1 mM Mn<sup>2+</sup> instead of calcium produced neither potentiation nor inactivation of cinnamaldehyde-induced currents. *Middle, right*, average TRPA1 currents evoked in response to 40 s exposure to 100 μM Cin. Subsequent additions of 0.1 mM Mn<sup>2+</sup> and 2 mM Ca<sup>2+</sup> are indicated by horizontal bars. The average current for the wild type is shown for comparison in gray in both plots. The currents are normalized to their maximal cinnamaldehyde responses obtained prior to the addition of Mn<sup>2+</sup> to the bath solution. Data represent the mean + S.E.M. for the number of cells indicated. For D1080A, the average current for 3 non-potentiated cells (in purple) is overlaid onto the average current from all cells (in green).
